# Supplementary material for: Smaller rare-earth cation and mixed valent Mn incorporation as a dual strategy to enhance ferrimagnetic ordering temperatures in A-site ordered quadruple perovskites, LnCu3Mn1+xTi3−xO12 (Ln = La, Nd; x = 0, 0.3)
Source: Royal Society of Chemistry journal article supplement (doi:10.1039/d4dt01859a), 2024-01-01
Supplement: d4dt01859a1.pdf [file d4dt01859a1.pdf]

### Supplementary information

## Smaller rare-earth cation and mixed valent Mn incorporation as a dual strategy to enhance ferrimagnetic ordering temperatures in A-site ordered quadruple perovskites, $\text{LnCu}_3\text{Mn}_{1+x}\text{Ti}_{3-x}\text{O}_{12}$ (Ln = La, Nd; $x = 0, 0.3$ )

Lalit Kumar,<sup>a, b</sup> Sujan Sen<sup>a</sup> and Tapas Kumar Mandal\*,<sup>a, c</sup>

<sup>a</sup>Department of Chemistry, Indian Institute of Technology Roorkee, Roorkee – 247667, India

<sup>b</sup>Department of Applied Science and Humanities, Invertis University, Bareilly – 243123, India

<sup>c</sup>Center for Nanotechnology, Indian Institute of Technology Roorkee, Roorkee – 247667, India.

Corresponding author:

\*E-mail: [tapas.mandal@cy.iitr.ac.in](mailto:tapas.mandal@cy.iitr.ac.in)

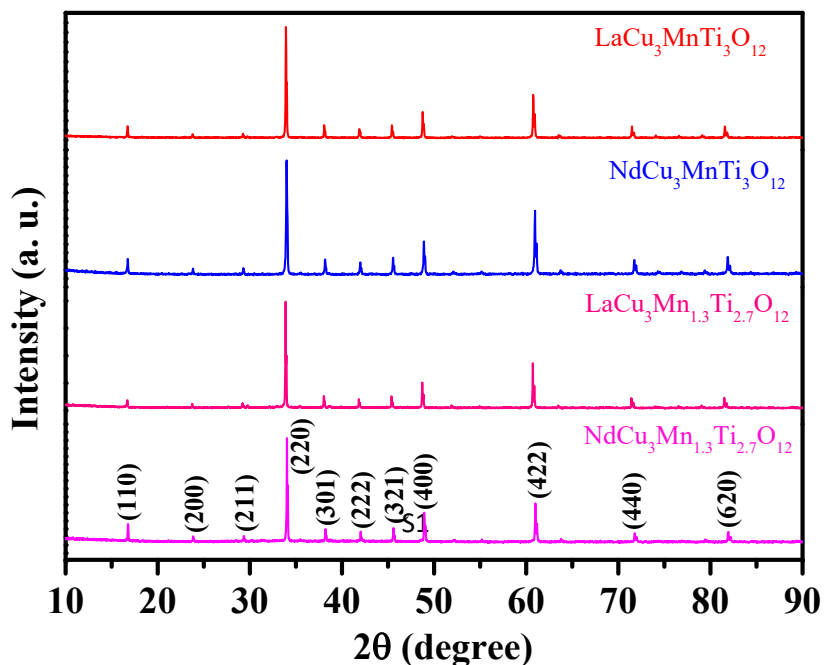

**Fig. S1** P-XRD patterns of (a)  $\text{LaCu}_3\text{MnTi}_3\text{O}_{12}$ , (b)  $\text{NdCu}_3\text{MnTi}_3\text{O}_{12}$ , (c)  $\text{LaCu}_3\text{Mn}_{1.3}\text{Ti}_{2.7}\text{O}_{12}$ , and (d)  $\text{NdCu}_3\text{Mn}_{1.3}\text{Ti}_{2.7}\text{O}_{12}$ .

**Table S1** Refined positional (x, y, z), thermal (B), occupancy parameters and reliability factors for  $\text{LnCu}_3\text{Mn}_{1+x}\text{Ti}_{3-x}\text{O}_{12}$  (Ln = La, Nd; x = 0, 0.3)

| Atom | Site | Position | $\text{LaCu}_3\text{MnTi}_3\text{O}_{12}$ | $\text{NdCu}_3\text{MnTi}_3\text{O}_{12}$ | $\text{LaCu}_3\text{Mn}_{1.3}\text{Ti}_{2.7}\text{O}_{12}$ | $\text{NdCu}_3\text{Mn}_{1.3}\text{Ti}_{2.7}\text{O}_{12}$ |
|------|------|----------|-------------------------------------------|-------------------------------------------|------------------------------------------------------------|------------------------------------------------------------|
|------|------|----------|-------------------------------------------|-------------------------------------------|------------------------------------------------------------|------------------------------------------------------------|

|                                                                                                                                                                            |     |  |           |           |             |             |
|----------------------------------------------------------------------------------------------------------------------------------------------------------------------------|-----|--|-----------|-----------|-------------|-------------|
| $a$ (Å)                                                                                                                                                                    |     |  | 7.4663(6) | 7.4526(8) | 7.4515(6)   | 7.4363(5)   |
| O 24g                                                                                                                                                                      | $x$ |  | 0.3042(1) | 0.3014(5) | 0.3176(1)   | 0.3020(9)   |
|                                                                                                                                                                            | $y$ |  | 0.1819(1) | 0.1799(4) | 0.1910(4)   | 0.1801(2)   |
| Occ (Mn/Ti) <sub>8c</sub>                                                                                                                                                  |     |  | 0.25/0.75 | 0.25/0.75 | 0.325/0.675 | 0.325/0.675 |
| $B(\text{Å}^2)$ (A) <sub>2a</sub>                                                                                                                                          |     |  | 0.32(4)   | 0.42(5)   | 0.65(1)     | 0.78(1)     |
| $B(\text{Å}^2)$ (Cu) <sub>6b</sub>                                                                                                                                         |     |  | 0.18(2)   | 0.32(4)   | 0.48(4)     | 0.67(6)     |
| $B(\text{Å}^2)$ (Mn/Ti) <sub>8c</sub>                                                                                                                                      |     |  | 0.25(3)   | 0.51(3)   | 0.36(4)     | 0.75(5)     |
| $B(\text{Å}^2)$ (O) <sub>24g</sub>                                                                                                                                         |     |  | 0.81(6)   | 0.78(8)   | 0.98(8)     | 0.87(9)     |
| $R_p$ (%)                                                                                                                                                                  |     |  | 3.62      | 4.21      | 6.14        | 4.15        |
| $R_{wp}$ (%)                                                                                                                                                               |     |  | 5.12      | 5.73      | 7.20        | 6.18        |
| $R_{Bragg}$ (%)                                                                                                                                                            |     |  | 2.76      | 4.08      | 5.64        | 4.57        |
| $R_F$ (%)                                                                                                                                                                  |     |  | 2.11      | 2.29      | 4.61        | 2.71        |
| $\chi^2$                                                                                                                                                                   |     |  | 2.79      | 2.27      | 4.57        | 3.10        |
| Atomic positions: La/Nd 2a (0, 0, 0), Cu 6b (0, 0.5, 0.5), Mn/Ti 8c (0.25, 0.25, 0.25), O 24g ( $x$ , $y$ , 0). The occupancy of rest La/Nd, Cu and O are 1. A = La or Nd. |     |  |           |           |             |             |

|                     |                                                       |                                                       |                                                                       |                                                                       |
|---------------------|-------------------------------------------------------|-------------------------------------------------------|-----------------------------------------------------------------------|-----------------------------------------------------------------------|
| <b>Lengths (Å);</b> | <b>LaCu<sub>3</sub>MnTi<sub>3</sub>O<sub>12</sub></b> | <b>NdCu<sub>3</sub>MnTi<sub>3</sub>O<sub>12</sub></b> | <b>LaCu<sub>3</sub>Mn<sub>1.3</sub>Ti<sub>2.7</sub>O<sub>12</sub></b> | <b>NdCu<sub>3</sub>Mn<sub>1.3</sub>Ti<sub>2.7</sub>O<sub>12</sub></b> |
| <b>Angles (°);</b>  |                                                       |                                                       |                                                                       |                                                                       |

| BVS                |          |          |          |          |
|--------------------|----------|----------|----------|----------|
| *A – O (× 12)      | 2.633(7) | 2.603(7) | 2.631(4) | 2.602(9) |
| Cu – O (× 4)       | 1.985(7) | 1.987(8) | 1.983(4) | 1.980(8) |
| Mn/Ti – O (× 6)    | 1.966(3) | 1.963(3) | 1.965(3) | 1.958(5) |
| ∠Mn/Ti – O – Mn/Ti | 141.6(3) | 141.7(8) | 140.5(8) | 141.5(8) |
| ∠Mn/Ti – O – Cu    | 108.9(4) | 108.8(4) | 109.7(4) | 108.7(4) |
| *∠A – O – Cu       | 106.2(6) | 107.0(7) | 102.2(6) | 106.6(6) |
| *∠A – O – Mn/Ti    | 87.5(4)  | 88.2(4)  | 84.1(4)  | 88.6(5)  |
| BVS (A)*           | 3.28     | 3.12     | 3.26     | 3.31     |
| BVS (Cu)           | 1.75     | 1.82     | 1.80     | 1.72     |
| BVS (Mn/Ti)        | 3.84     | 3.86     | 3.70     | 3.96     |
| *A = La or Nd      |          |          |          |          |

**Table S2** Bond lengths, bond angles and bond valence sums of  $\text{LnCu}_3\text{Mn}_{1+x}\text{Ti}_{3-x}\text{O}_{12}$  (Ln = La, Nd; x = 0, 0.3)

**Fig. S2** FE-SEM images of (a)  $\text{LaCu}_3\text{MnTi}_3\text{O}_{12}$ , (b)  $\text{NdCu}_3\text{MnTi}_3\text{O}_{12}$ , (c)  $\text{LaCu}_3\text{Mn}_{1.3}\text{Ti}_{2.7}\text{O}_{12}$ , and (d)  $\text{NdCu}_3\text{Mn}_{1.3}\text{Ti}_{2.7}\text{O}_{12}$ .

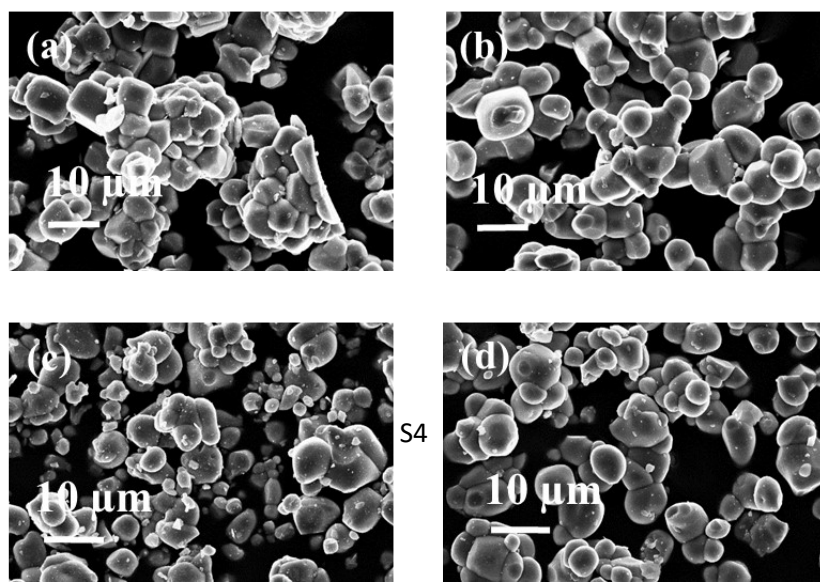

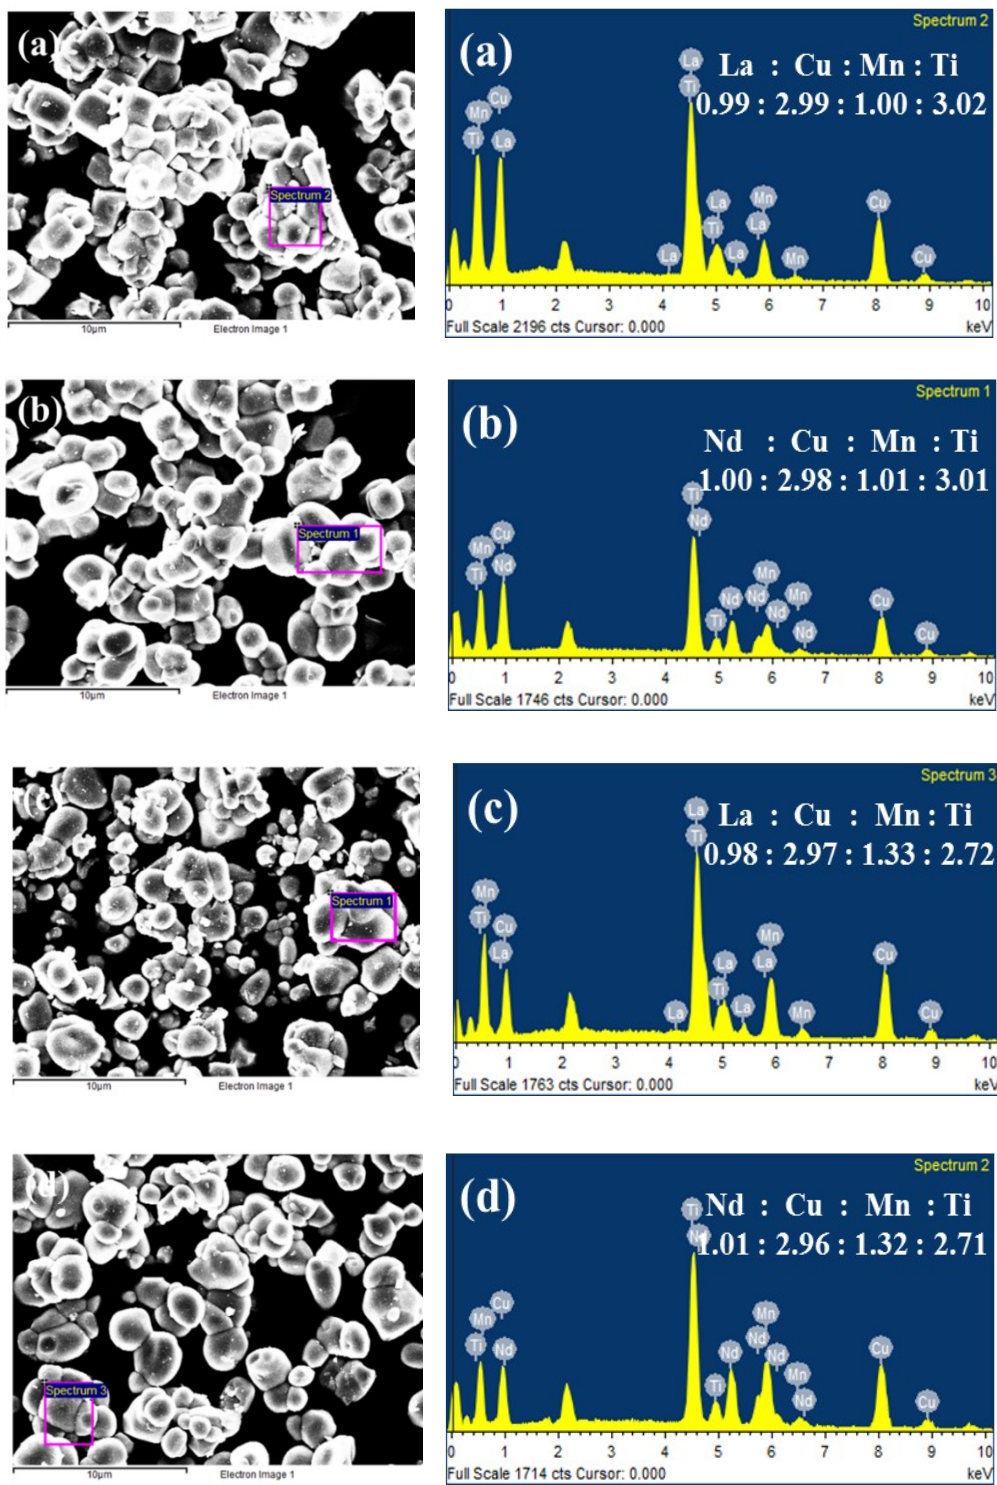

Fig. S3 EDS data of (a)  $\text{LaCu}_3\text{MnTi}_3\text{O}_{12}$ , (b)  $\text{NdCu}_3\text{MnTi}_3\text{O}_{12}$ , (c)  $\text{LaCu}_3\text{Mn}_{1.3}\text{Ti}_{2.7}\text{O}_{12}$ , and (d)

$\text{NdCu}_3\text{Mn}_{1.3}\text{Ti}_{2.7}\text{O}_{12}$ .

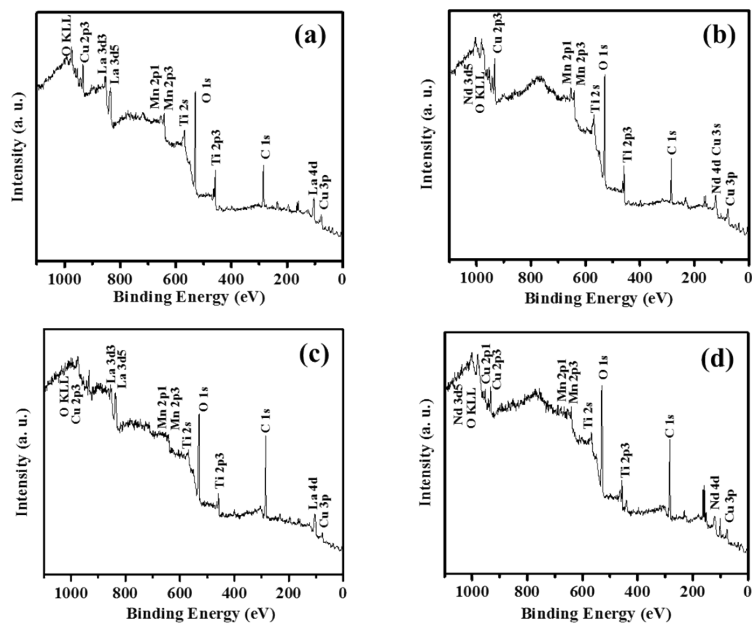

**Fig. S4** Survey XPS spectra of (a)  $\text{LaCu}_3\text{MnTi}_3\text{O}_{12}$ , (b)  $\text{NdCu}_3\text{MnTi}_3\text{O}_{12}$ , (c)  $\text{LaCu}_3\text{Mn}_{1.3}\text{Ti}_{2.7}\text{O}_{12}$ , and (d)  $\text{NdCu}_3\text{Mn}_{1.3}\text{Ti}_{2.7}\text{O}_{12}$ .

**Table S3** XPS binding energies of  $\text{LaCu}_3\text{MnTi}_3\text{O}_{12}$ ,  $\text{NdCu}_3\text{MnTi}_3\text{O}_{12}$ ,  $\text{LaCu}_3\text{Mn}_{1.3}\text{Ti}_{2.7}\text{O}_{12}$ , and

| Compounds          | $\text{LaCu}_3\text{MnTi}_3\text{O}_{12}$ | $\text{NdCu}_3\text{MnTi}_3\text{O}_{12}$ | $\text{LaCu}_3\text{Mn}_{1.3}\text{Ti}_{2.7}\text{O}_{12}$ | $\text{NdCu}_3\text{Mn}_{1.2}\text{Ti}_{2.7}\text{O}_{12}$ | Ref. |
|--------------------|-------------------------------------------|-------------------------------------------|------------------------------------------------------------|------------------------------------------------------------|------|
| Mn $2p_{3/2}$ (eV) | 641.7                                     | 641.4                                     | 641.6 ( $\text{Mn}^{3+}$ )                                 | 641.5 ( $\text{Mn}^{3+}$ )                                 | 1    |
|                    |                                           |                                           | 643.5 ( $\text{Mn}^{4+}$ )                                 | 643.7 ( $\text{Mn}^{4+}$ )                                 |      |
| Mn $2p_{1/2}$ (eV) | 653.2                                     | 653.3                                     | 652.7 ( $\text{Mn}^{3+}$ )                                 | 652.5 ( $\text{Mn}^{3+}$ )                                 | 1    |
|                    |                                           |                                           | 654.2 ( $\text{Mn}^{4+}$ )                                 | 654.8 ( $\text{Mn}^{4+}$ )                                 |      |
| Cu $2p_{3/2}$ (eV) | 933.5                                     | 933.2                                     | 933.8                                                      | 933.6                                                      | 2    |
| Cu $2p_{1/2}$ (eV) | 953.7                                     | 953.4                                     | 953.7                                                      | 953.6                                                      | 2    |

$\text{NdCu}_3\text{Mn}_{1.3}\text{Ti}_{2.7}\text{O}_{12}$

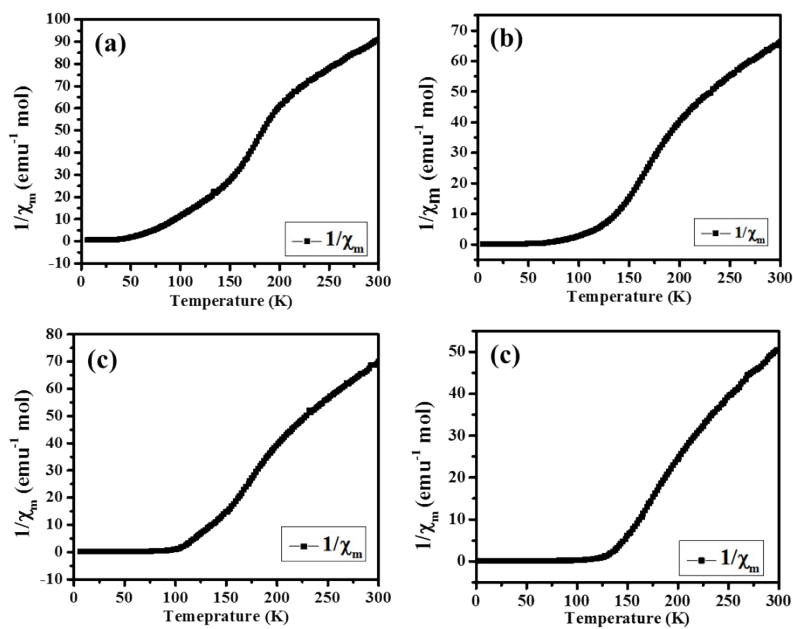

**Fig. S5** Inverse magnetic susceptibility vs. temperature plots of (a)  $\text{LaCu}_3\text{MnTi}_3\text{O}_{12}$ , (b)

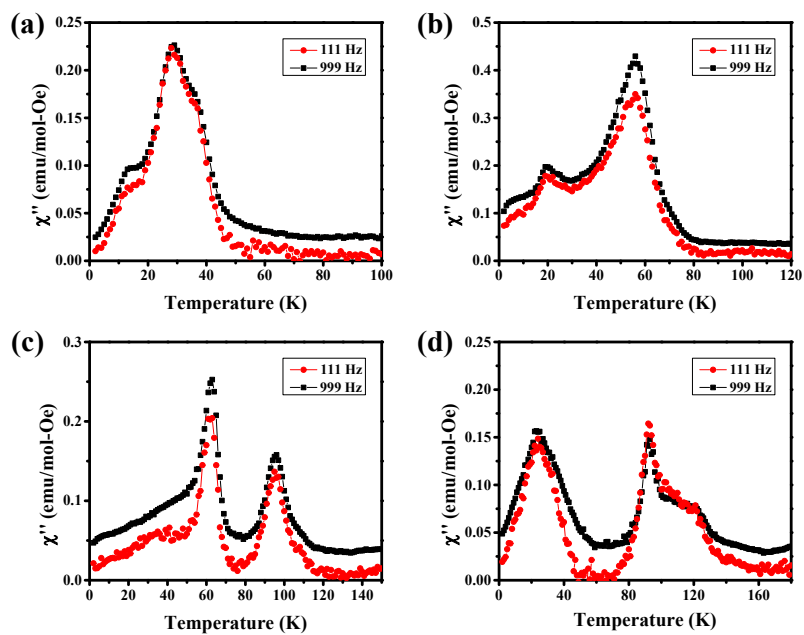

(c)  $\text{LaCu}_3\text{Mn}_{1.3}\text{Ti}_{2.7}\text{O}_{12}$ , and (d)  $\text{NdCu}_3\text{Mn}_{1.3}\text{Ti}_{2.7}\text{O}_{12}$ .

**Fig. S6**  $\chi''$  vs. T plots of (a)  $\text{LaCu}_3\text{MnTi}_3\text{O}_{12}$ , (b)  $\text{NdCu}_3\text{MnTi}_3\text{O}_{12}$ , (c)  $\text{LaCu}_3\text{Mn}_{1.3}\text{Ti}_{2.7}\text{O}_{12}$ , and (d)

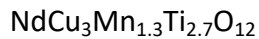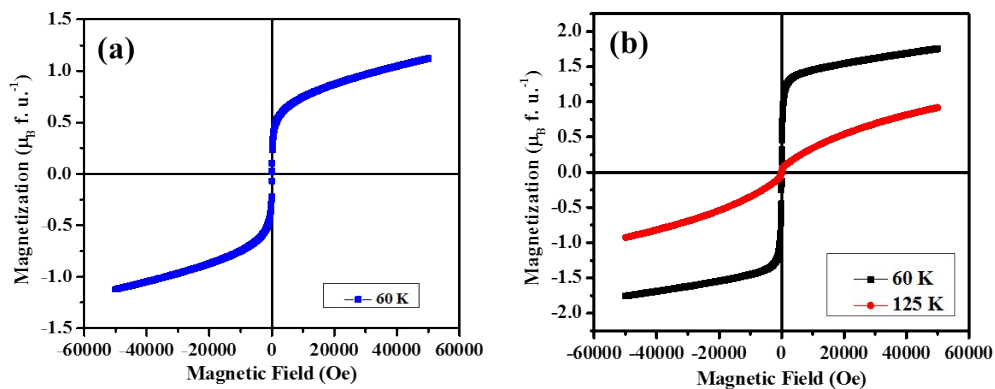

**Fig. S7** Magnetization vs. magnetic field plots of (a)  $\text{NdCu}_3\text{MnTi}_3\text{O}_{12}$  at 60 K, and (b)

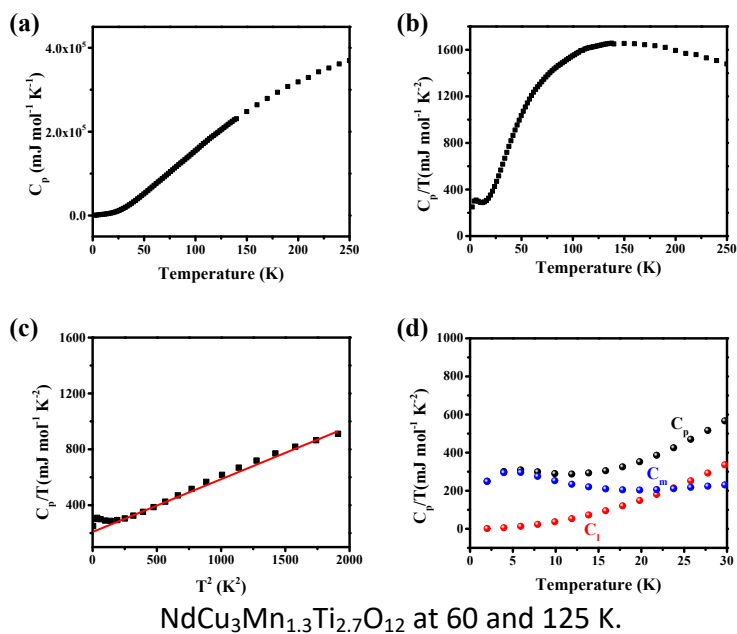



**Fig. S8** Heat capacity data (a)  $C_p$  vs.  $T$ , (b)  $C_p/T$  vs.  $T$ , (c)  $C_p/T$  vs.  $T^2$  and (d) lattice contribution (red) and magnetic contribution (blue) to total heat capacity (black) of  $\text{LaCu}_3\text{Mn}_{1.3}\text{Ti}_{2.7}\text{O}_{12}$ .

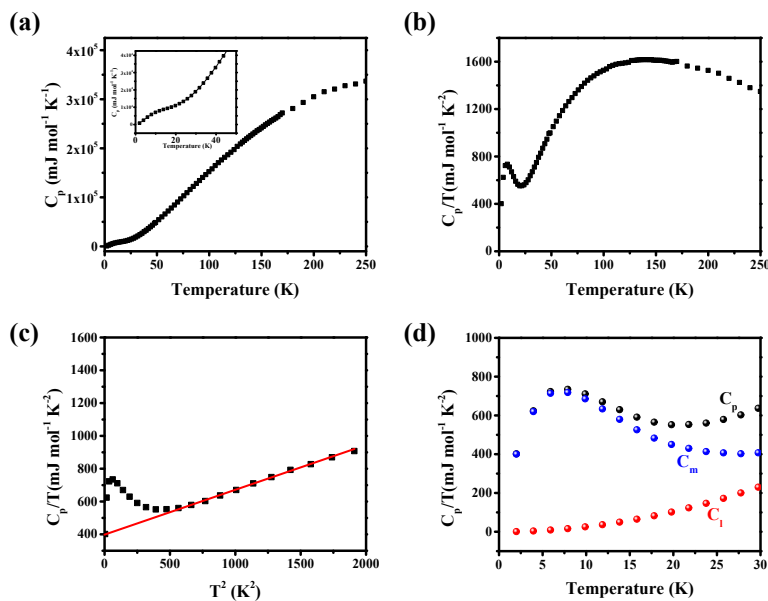

**Fig. S9** Heat capacity data (a)  $C_p$  vs.  $T$ , (b)  $C_p/T$  vs.  $T$ , (c)  $C_p/T$  vs.  $T^2$  and (d) lattice contribution (red) and magnetic contribution (blue) to total heat capacity (black) of  $\text{NdCu}_3\text{Mn}_{1.3}\text{Ti}_{2.7}\text{O}_{12}$ .

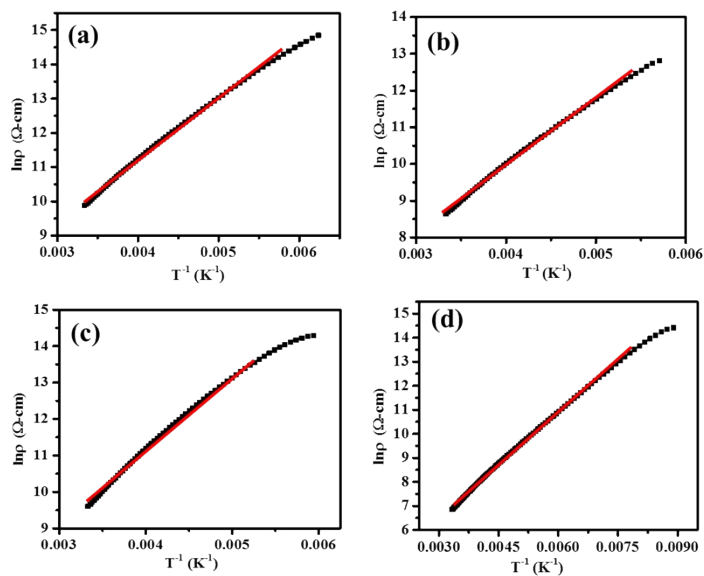

**Fig. S10**  $\ln \rho$  vs.  $T^{-1}$  of (a)  $\text{LaCu}_3\text{MnTi}_3\text{O}_{12}$ , (b)  $\text{NdCu}_3\text{MnTi}_3\text{O}_{12}$ , (c)  $\text{LaCu}_3\text{Mn}_{1.3}\text{Ti}_{2.7}\text{O}_{12}$ , and (d)  $\text{NdCu}_3\text{Mn}_{1.3}\text{Ti}_{2.7}\text{O}_{12}$ .

## References

- 1 M. C. Biesinger, L. W. M. Lau, A. R. Gerson, R. S. C. Smart, *Appl. Surf. Sci.*, 2010, **257**, 887.
- 2 M. Oku, K. Hirokawa, S. Ikeda, *J. Electron Spectrosc. Related Phenom.*, 1975, **7**, 465.
